# Supplementary material
Source: PubMed Central journal article supplement (PMC8366436)
Supplement: jiab283_suppl_supplementary_figure_s2.pdf [file jiab283_suppl_supplementary_figure_s2.pdf]

FIGURE S2

RELATIONSHIP OF SEQUENCING COVERAGE TO SAMPLE VIRAL LOAD

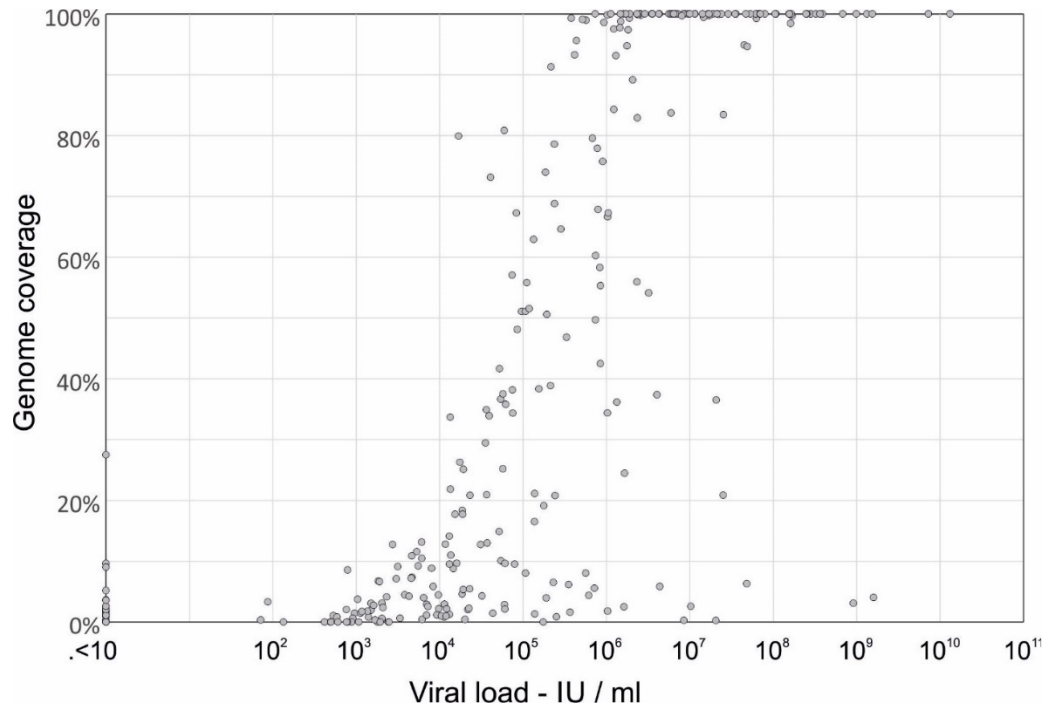

Genome coverage of consensus sequences of SARS-CoV-2 in study samples.
