# Supplementary material
Source: PubMed Central journal article supplement (PMC8366436)
Supplement: jiab283_suppl_supplementary_figure_s5.pdf [file jiab283_suppl_supplementary_figure_s5.pdf]

FIGURE S5

REGIONAL REPRESENTATION OF STUDY SUBJECTS AND SARS-CoV-2 CASES IN ENGLAND

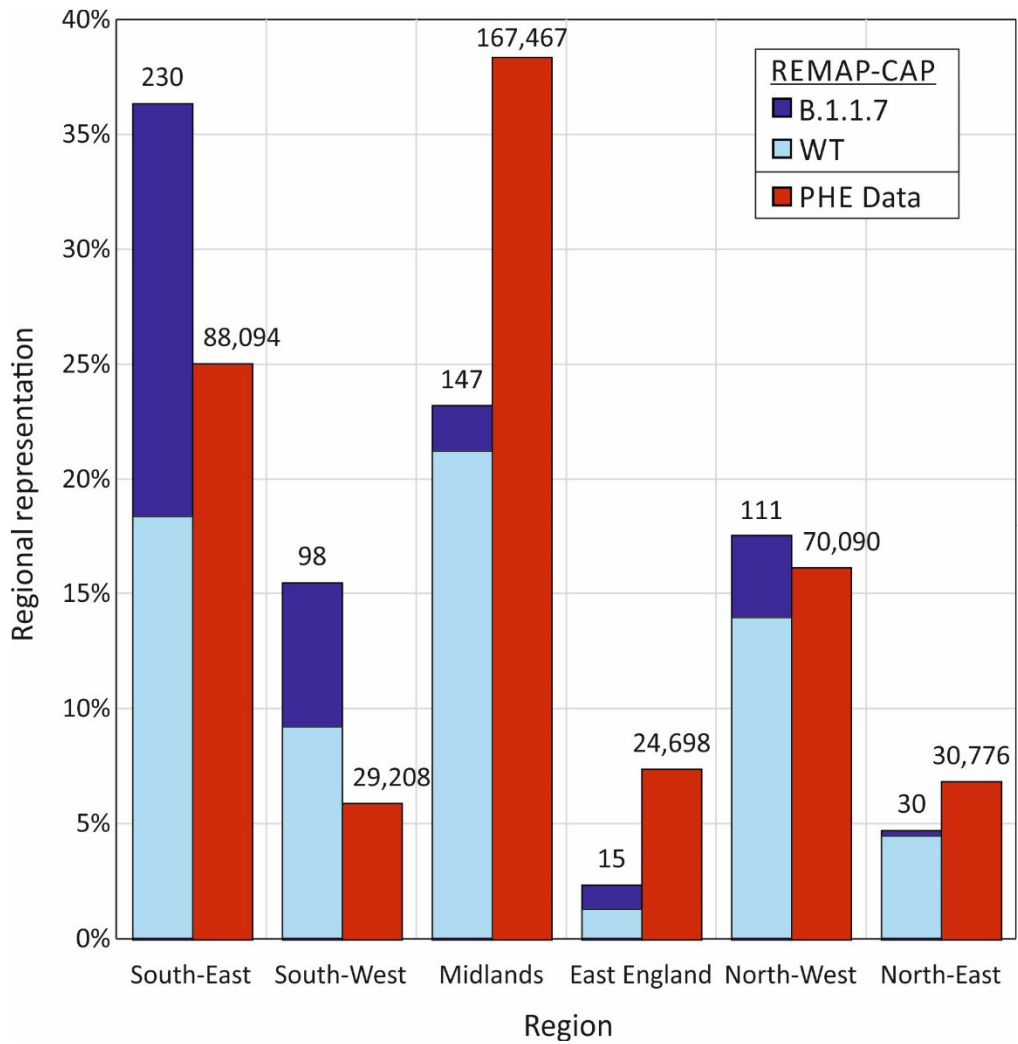

Geographical origins of the study subjects and reported cases of SARS-CoV-2 infection England during the study period. Regional representation of subjects enrolled into the REMAP-CAP trial compared to distributions of SARS-CoV-2 infections proportions in England regions reported to PHE over the study period. Numbers at the top of the graph indicate enrolments numbers / region.
