# Supplementary material
Source: PubMed Central journal article supplement (PMC8366436)
Supplement: jiab283_suppl_supplementary_table_s3.pdf [file jiab283_suppl_supplementary_table_s3.pdf]

TABLE S3

CONCORDANCE OF ASP AND RFLP ASSAYS WITH HTS

|  |         | ASP   |    |         | RFLP            |    |                |                 |
|--|---------|-------|----|---------|-----------------|----|----------------|-----------------|
|  | HTS     | Total | WT | B.1.1.7 | NR <sup>1</sup> | WT | B.1.1.7        | NR <sup>1</sup> |
|  | WT      | 30    | 30 | 9       | 0               | 26 | 1 <sup>2</sup> | 3               |
|  | B.1.1.7 | 10    | 0  | 9       | 1               | 0  | 9              | 1               |

<sup>1</sup>No result obtained

<sup>2</sup>Sanger sequencing identified a T→C polymorphism at position 24810 that disrupted the restriction site
