# Supplementary material
Source: PubMed Central journal article supplement (PMC8366436)
Supplement: jiab283_suppl_supplementary_table_s4.pdf [file jiab283_suppl_supplementary_table_s4.pdf]

TABLE S4

## DEMOGRAPHIC AND CLINICAL ASSOCIATIONS WITH VIRUS TYPE

|               | <b>WT</b> | <b>B.1.1.7</b> | <b><i>p</i></b> | <b>BLR <i>p</i></b> |
|---------------|-----------|----------------|-----------------|---------------------|
| <i>All</i>    |           |                |                 |                     |
| Viral load    | 718,445   | 3,536,790      | 2.7E-08         | 1.1E-08             |
| Age           | 63        | 60             | 0.002           | 0.001               |
| BMI           | 30.1      | 31.8           | 0.026           | 0.41                |
| <i>Ab-Neg</i> |           |                |                 |                     |
| Viral load    | 5,746,214 | 4,168,803      | 0.57            | 0.20                |
| Age           | 63        | 61             | 0.16            | 0.17                |
| BMI           | 29.4      | 31.6           | 0.32            | 0.58                |
| <i>Ab-Pos</i> |           |                |                 |                     |
| Viral load    | 196,556   | 1,840,314      | 1.5E-10         | 1.0E-09             |
| Age           | 63        | 59             | 0.005           | 0.005               |
| BMI           | 29.4      | 30.9           | 0.05            | 0.60                |

<sup>1</sup>*p* value from binary logistic regression
